# Supplementary material for: Relation between the Macroscopic Pattern of Elephant Ivory and Its Three-Dimensional Micro-Tubular Network
Source: PLOS journal article supplement (doi:10.1371/journal.pone.0166671), 2017-01-26

**S4 Fig.** Quantitative 2D elemental chemical maps of the transverse section of elephant ivory. 2D maps of  $3 \times 3 \text{ mm}^2$  of major elements of ivory (Ca and P), minor element (Mg) and traces (Na, S, Cl, K, Fe and Sr) obtained by Proton induced x-ray emission. Concentrations are expressed in wt.%.

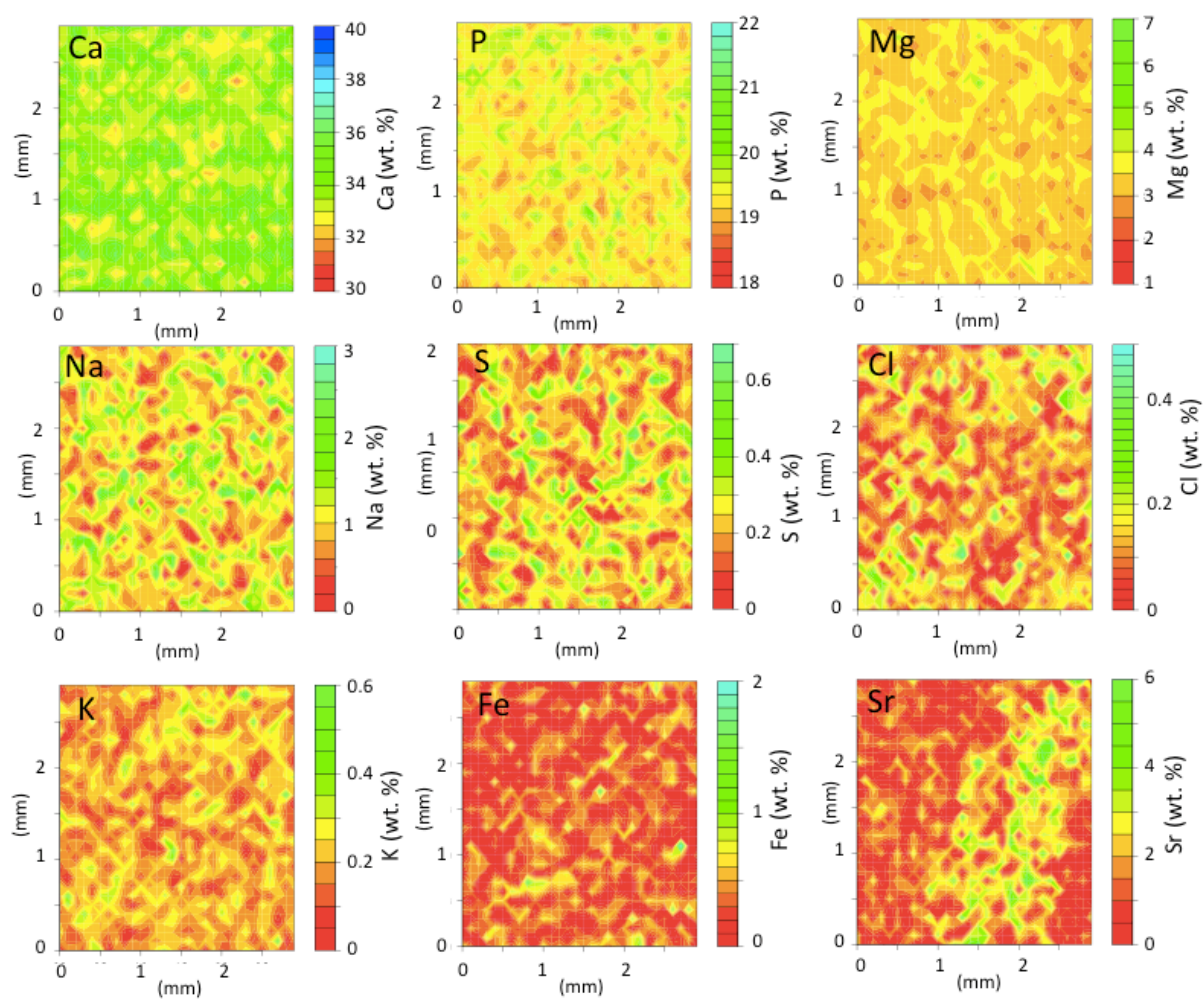

Supplement: S5 (10.1371/journal.pone.0166671.s005) [file journal.pone.0166671.s005]
